# Supplementary material for: Coexistence of antiferromagnetism and ferromagnetism in Mn2+/CdS nanocrystals and their photophysical properties
Source: Royal Society of Chemistry journal article supplement (doi:10.1039/c3ra22177f), 2013-01-01

## Electronic Supplementary Information

### COEXISTENCE OF ANTIFERROMAGNETISM AND FERROMAGNETISM IN $\text{Mn}^{2+}/\text{CdS}$ NANORODS AND THEIR PHOTOPHYSICAL PROPERTIES

Table 1. Photoluminescence properties of un-doped and manganese doped CdS nanocrystals

| System                                                                                                        | Peak position (nm) | Peak width ( $\text{cm}^{-1}$ ) | Peak Amplitude (a.u) | Peak Intensity (a.u.) |
|---------------------------------------------------------------------------------------------------------------|--------------------|---------------------------------|----------------------|-----------------------|
| <b>Un-doped</b> $V_{\text{Cd(lattice)}}$<br><b>Trap</b> (sulfur ; surface)                                    | <b>552</b>         | <b>2867</b>                     | <b>4.55</b>          | <b>13045</b>          |
|                                                                                                               | <i>610</i>         | <i>1749</i>                     | <i>2.28</i>          | <i>3988</i>           |
| <b>0.1%</b> $V_{\text{Cd(lattice)}}$<br><b>Trap</b> (sulfur ; surface)<br><b>Mn<sup>2+</sup></b>              | <b>556</b>         | <b>2853</b>                     | <b>3.21</b>          | <b>9158</b>           |
|                                                                                                               | <i>610</i>         | <i>1652</i>                     | <i>2.42</i>          | <i>3997</i>           |
|                                                                                                               | <b><u>585</u></b>  | <b><u>1632</u></b>              | <b><u>2.90</u></b>   | <b><u>4733</u></b>    |
| <b>0.5%</b> $V_{\text{Cd(lattice)}}$<br><b>Trap</b> (sulfur ; surface)<br><b>Mn<sup>2+</sup></b>              | <b>555</b>         | <b>2854</b>                     | <b>2.92</b>          | <b>8334</b>           |
|                                                                                                               | <i>610</i>         | <i>1641</i>                     | <i>2.33</i>          | <i>3824</i>           |
|                                                                                                               | <b><u>585</u></b>  | <b><u>1635</u></b>              | <b><u>2.34</u></b>   | <b><u>3826</u></b>    |
| <b>1%</b> $V_{\text{Cd(lattice)}}$<br><b>Trap</b> (sulfur ; surface)<br><b>Mn<sup>2+</sup></b>                | <b>556</b>         | <b>2852</b>                     | <b>2.85</b>          | <b>8128</b>           |
|                                                                                                               | <i>610</i>         | <i>1642</i>                     | <i>2.28</i>          | <i>3744</i>           |
|                                                                                                               | <b><u>586</u></b>  | <b><u>1635</u></b>              | <b><u>2.07</u></b>   | <b><u>3384</u></b>    |
| <b>5%</b> $V_{\text{Cd(lattice)}}$<br><b>Trap</b> (sulfur ; surface)<br><b>Mn<sup>2+</sup></b>                | <b>556</b>         | <b>2851</b>                     | <b>2.68</b>          | <b>7641</b>           |
|                                                                                                               | <i>610</i>         | <i>1641</i>                     | <i>1.95</i>          | <i>3400</i>           |
|                                                                                                               | <b><u>588</u></b>  | <b><u>1632</u></b>              | <b><u>1.35</u></b>   | <b><u>2203</u></b>    |
| <b>5% Post -annealed</b> $V_{\text{Cd(lattice)}}$<br><b>Trap</b> (sulfur ; surface)<br><b>Mn<sup>2+</sup></b> | <b>556</b>         | <b>2849</b>                     | <b>2.48</b>          | <b>7066</b>           |
|                                                                                                               | <i>610</i>         | <i>1635</i>                     | <i>1.71</i>          | <i>2796</i>           |
|                                                                                                               | <b><u>589</u></b>  | <b><u>1638</u></b>              | <b><u>0.72</u></b>   | <b><u>1179</u></b>    |

Table 2. EPR properties of pre-annealed CdS/Mn<sup>2+</sup> at 300 and 77 K

| CdS/ % Mn <sup>2+</sup> | T in K | Line width ( $\Delta H_{pp}$ ) in mT | Amplitude | Peak Intensity |
|-------------------------|--------|--------------------------------------|-----------|----------------|
| 0.1%                    | 300    | 20.5                                 | 0.321     | 65.6           |
|                         | 77     | 19.8                                 | 0.106     | 21.0           |
| 0.5%                    | 300    | 19.5                                 | 0.161     | 31.2           |
|                         | 77     | 19.4                                 | 0.054     | 10.5           |
| 1%                      | 300    | 18.0                                 | 0.150     | 27.0           |
|                         | 77     | 19.1                                 | 0.052     | 09.9           |
| 5%                      | 300    | 17.0                                 | 0.130     | 22.1           |
|                         | 77     | 19.0                                 | 0.045     | 08.5           |

ESI Fig. 1 Manganese PL intensity vs manganese concentrations. Inset: Manganese d-d emission peak position vs manganese concentration

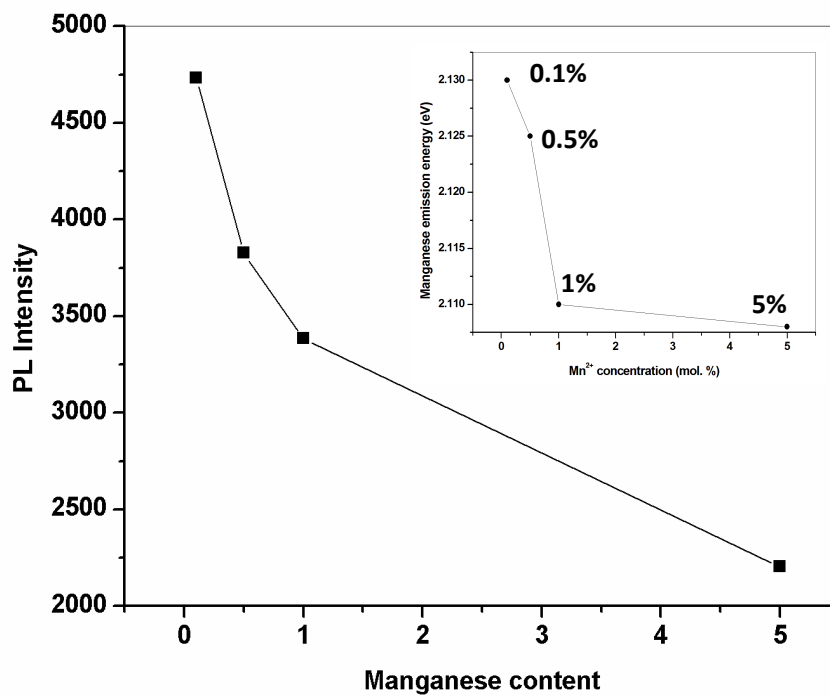

Supplement: c3ra22177f.pdf [file c3ra22177f.pdf]
